# Supplementary material
Source: publisher site journal article supplement (https://www.dovepress.com/article/511208)
Supplement: Supplementary file 1 [file get_supplementary_file.php]

| Table S1. Comparison of Serum sASGR1 Levels (ng/ml) Based on Liver and Carotid Status in NGT and T2DM Populations | | |
| --- | --- | --- |
|  | NGT | T2DM |
| Fatty Liver | 4.74 (3.00, 7.42) | 6.98 (4.81, 10.66) |
| Non-Fatty Liver | 5.46 (3.63, 8.49) | 5.68 (3.97, 9.91) |
| *z* | -1.276 | -1.717 |
| *p* | 0.202 | 0.086 |
| Carotid Atherosclerosis | 6.10 (3.26, 8.58) | 5.63 (4.54, 10.31) |
| Non-Carotid Atherosclerosis | 4.38 (3.00, 7.46) | 6.76 (4.64, 10.69) |
| *z* | -1.243 | -0.757 |
| *p* | 0.214 | 0.449 |
| Data are presented as the median with the 25th percentile and 75th percentile. sASGR1: soluble asialoglycoprotein receptor; NGT: normal glucose tolerance; T2DM: type 2 diabetes mellitus. | | |
